# Supplementary material for: Transcriptome and functional analysis reveals hybrid vigor for oil biosynthesis in oil palm
Source: PubMed Central journal article supplement (PMC5428490; doi:10.1038/s41598-017-00438-8), 2017-03-27
Supplement: 41598_2017_438_MOESM1_ESM.pdf [file 41598_2017_438_MOESM1_ESM.pdf]

# **Transcriptome and functional analysis reveals hybrid vigor for oil biosynthesis in oil palm**

Jingjing Jin<sup>1,2,3,6,#</sup>, Yanwei Sun<sup>4,#</sup>, Jing Qu<sup>1</sup>, Rahmadsyah<sup>5</sup>, Chin-Huat Lim<sup>5</sup>, Yuzer Alfiko<sup>5</sup>, NurEstyaBte Rahman<sup>5</sup>, Antonius Suwanto<sup>5</sup>, Genhua Yue<sup>1</sup>, Limsoon Wong<sup>3</sup>, Nam-Hai Chua<sup>2</sup> and Jian Ye<sup>1,4\*</sup>

<sup>1</sup>Temasek Life Sciences Laboratory, National University of Singapore, 1 Research Link, 117604 Singapore;

<sup>2</sup>Laboratory of Plant Molecular Biology, Rockefeller University, 1230 York Avenue, New York, NY 10021, USA;

<sup>3</sup>School of Computing, National University of Singapore, 117417 Singapore;

<sup>4</sup>State Key laboratory of Plant Genomics, Institute of Microbiology, Chinese Academy of Sciences, Beijing, 100101, China;

<sup>5</sup>R & D Department, Wilmar International Plantation, Palembang, Indonesia Biotech Lab, Wilmar International, Jakarta, Indonesia;

<sup>6</sup>China Tobacco Gene Research Center, Zhengzhou Tobacco Research Institute of CNTC, Zhengzhou, Henan, 450001, China;

# These authors contributed equally.

## **\* Corresponding author**

E-mail: [jianye@im.ac.cn](mailto:jianye@im.ac.cn);

Telephone: 86-10-64807363;

Fax: 86-10-64858245

## Supplementary Figure S1

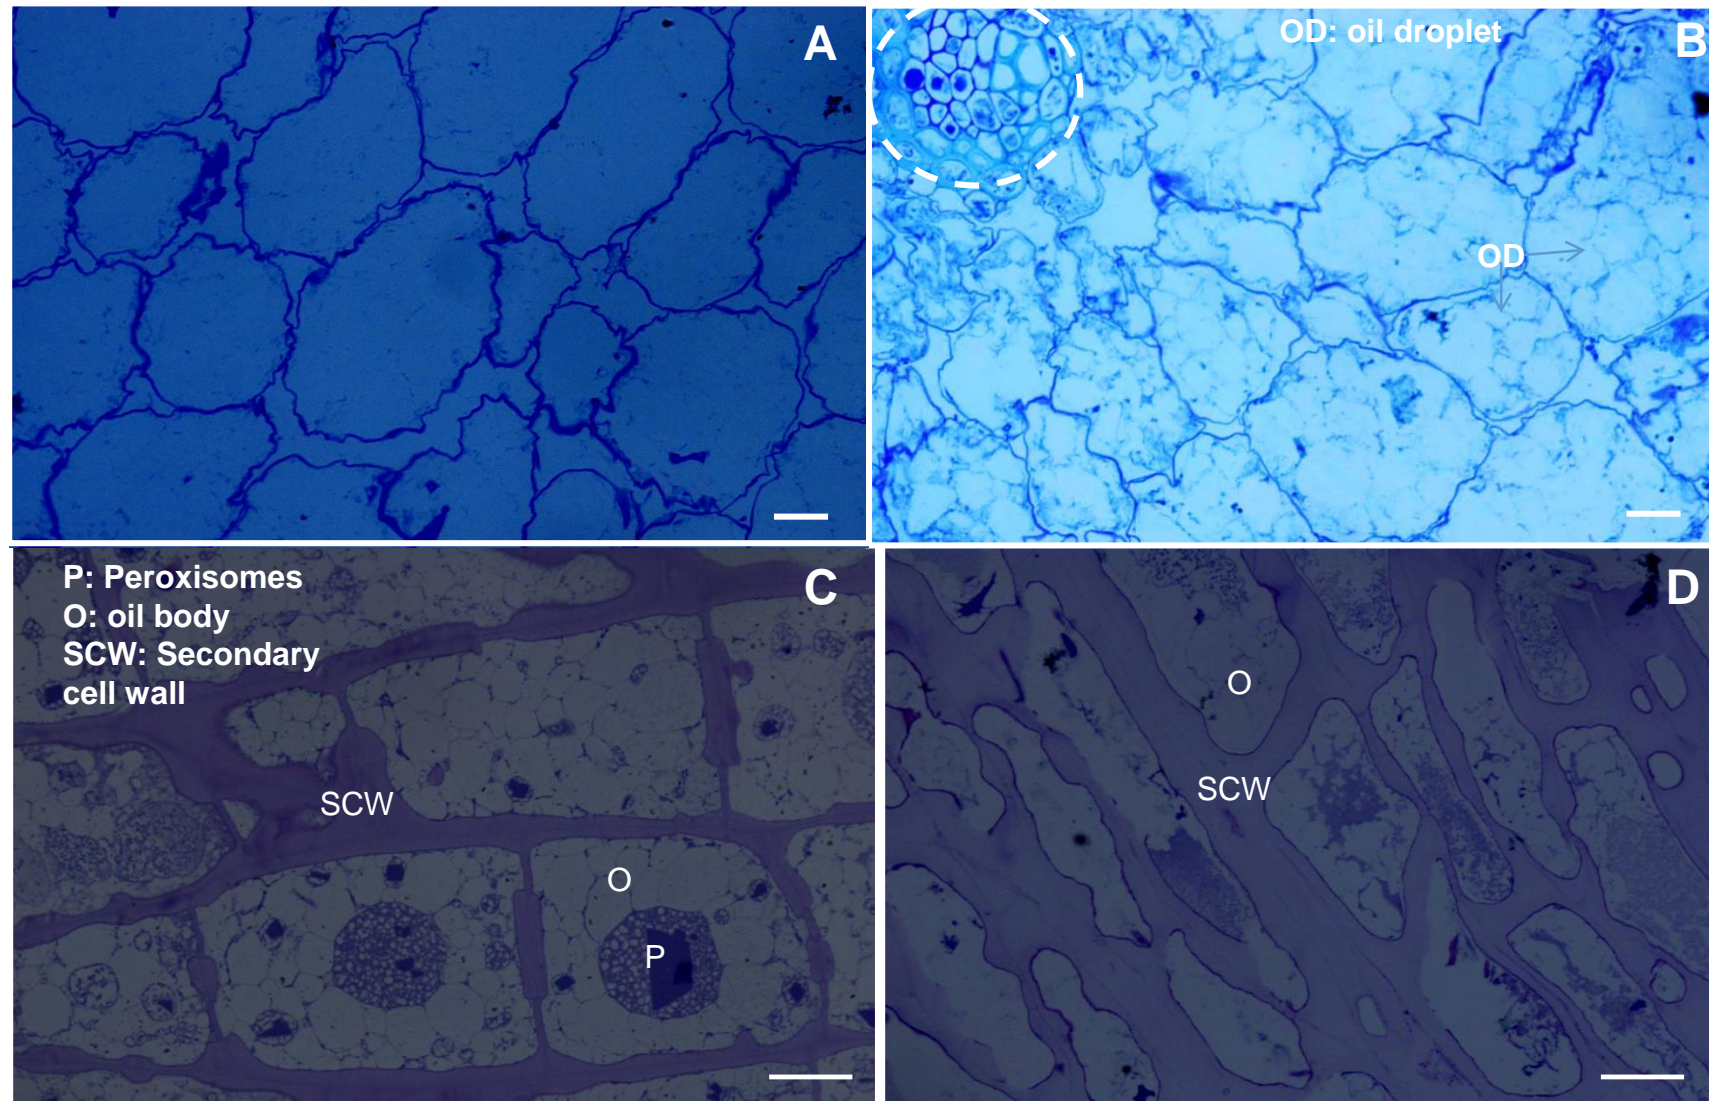

### Supplementary Figure S1: Microscopy observation of mesocarp (A and B) endosperm (C and D) and of developing oil palm fruits.

Mesocarp of *Dura* (A) and *Tenera* (B) at the same developing stage (4.5 Months After fertilization) were analysed. Broken circle line indicates the vascular-like structure. Oil droplets (ODs) were more obvious in mesocarp of *Tenera* compared with the *Dura* mesocarp of the same developing stage. Endosperm of *Dura* in 3.5 Months After fertilization (C) and 5.5 Months After fertilization (D) were analysed. The secondary cell wall were enhanced in later stage (C) compared with early stage (D). Bar: 20 $\mu$ m.

**Supplementary Figure S2**

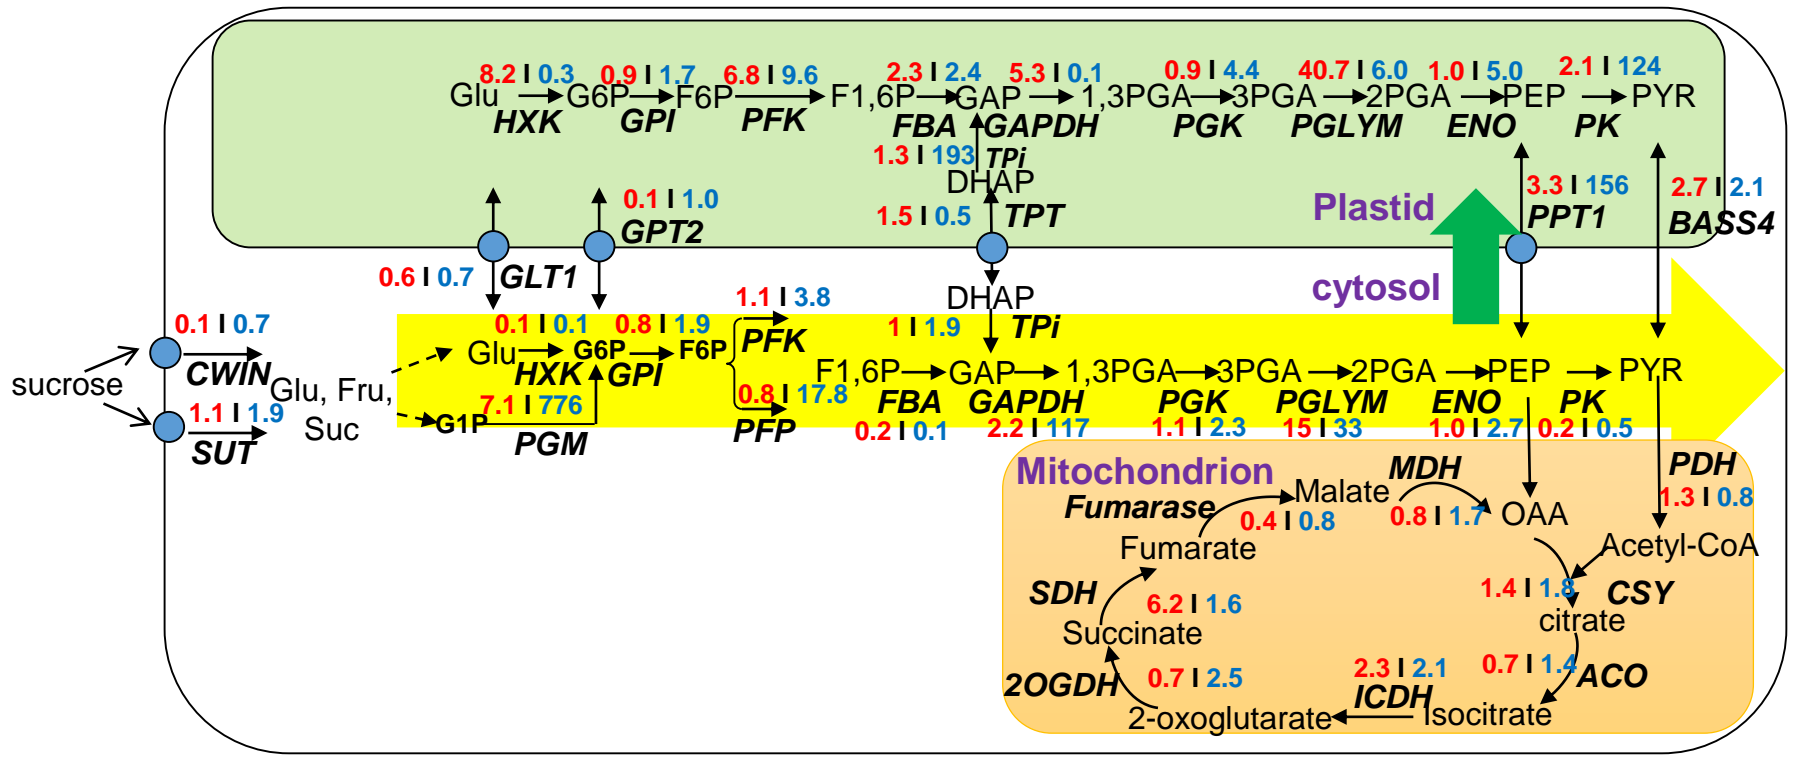

**Supplementary Figure S2: Transcripts patterns for enzymes involved in glycolysis reactions for Pisifera and Tenera.** Values in red indicate the fold increase in reads of mesocarp of Tenera to that of Pisifera at 3.5 MAF. Values in blue indicate the fold increase in reads of endosperm of Tenera to that of Pisifera at 2.5/4.5 MAF. Samples collected from different tissues for Dura, Pisifera and Tenera (#53) were used for transcriptome analysis.

**Supplementary Figure S3**

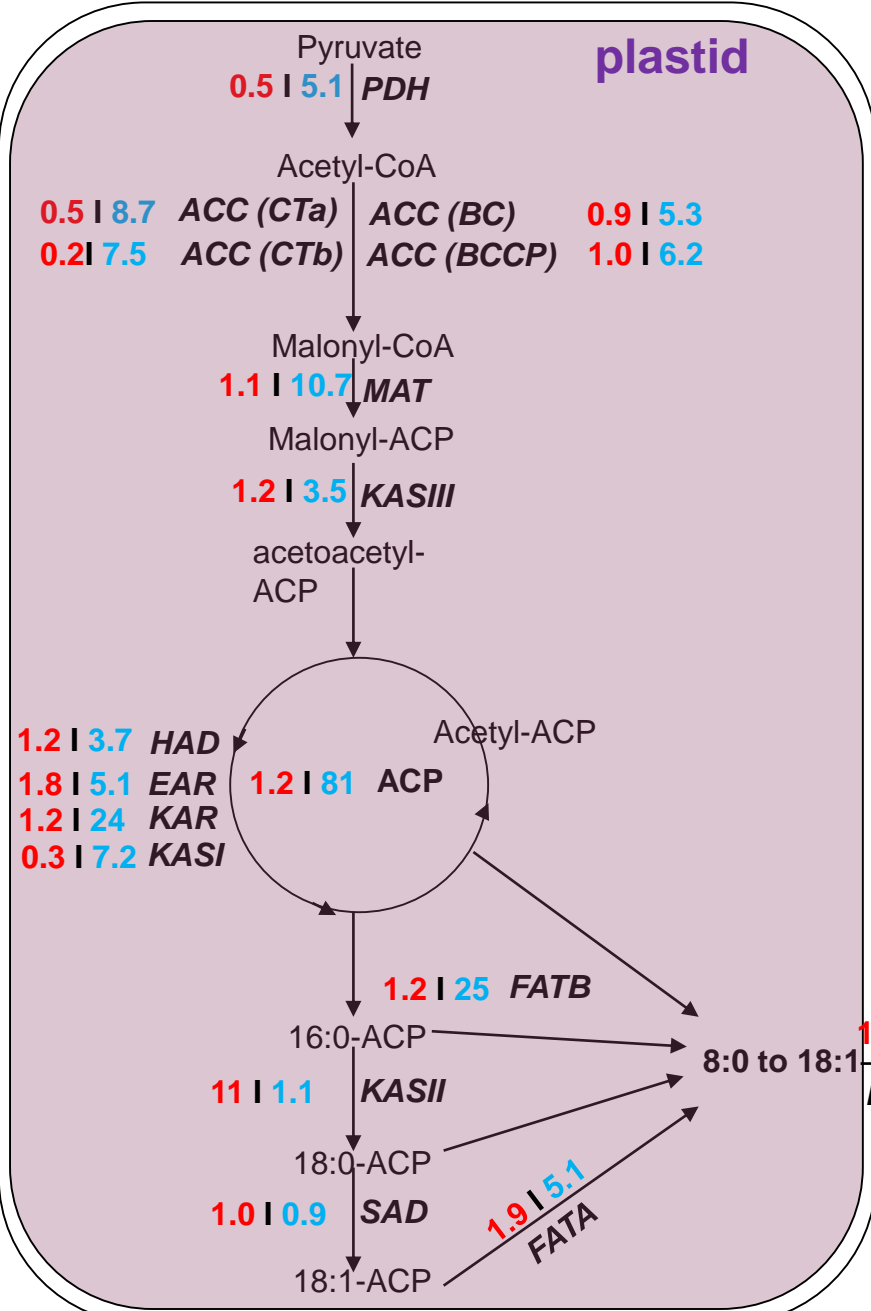

**Supplementary Figure S3: Transcripts patterns for enzymes involved in plastidial and extraplastidial reactions for Pisifera and Tenera.** Values in red indicate the fold increase in reads of mesocarp of Tenera to that of Pisifera at 3.5 MAF. Values in blue indicate the fold increase in reads of endosperm of Tenera to that of Pisifera at 2.5/4.5 MAF. Reads for enzymes with multiple isoforms were summed.

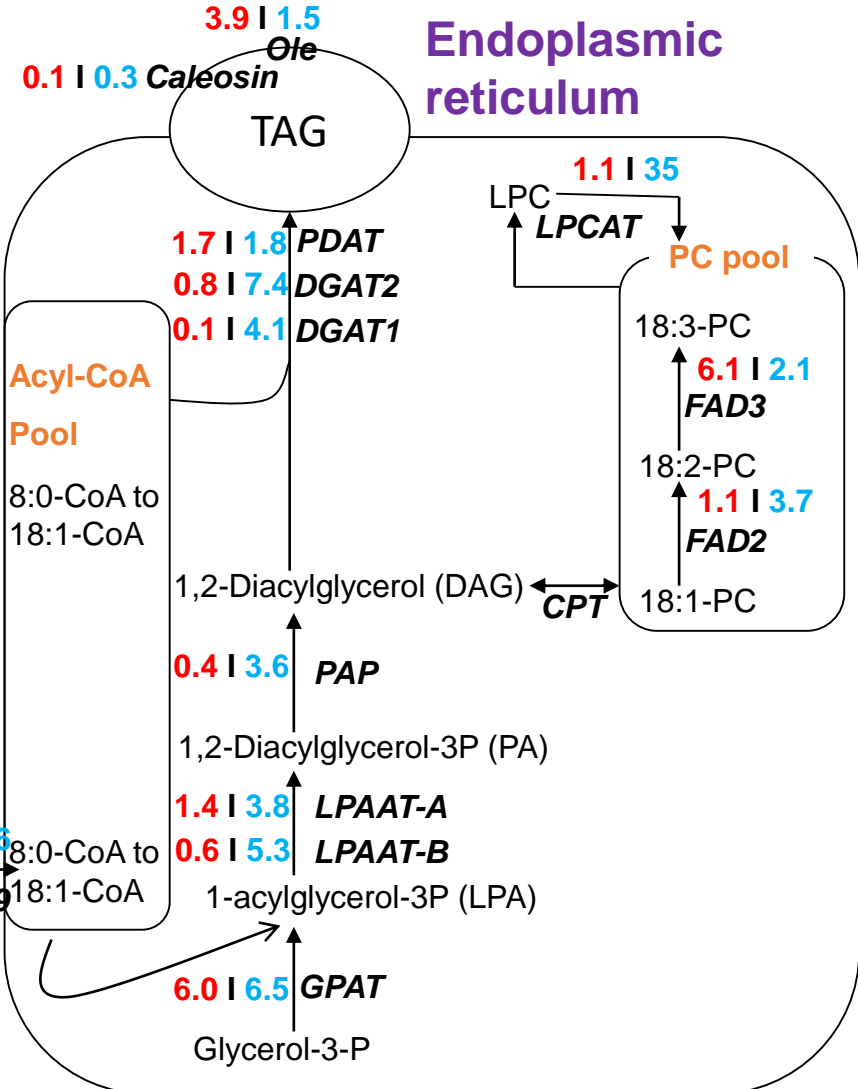

**Supplementary Figure S4**

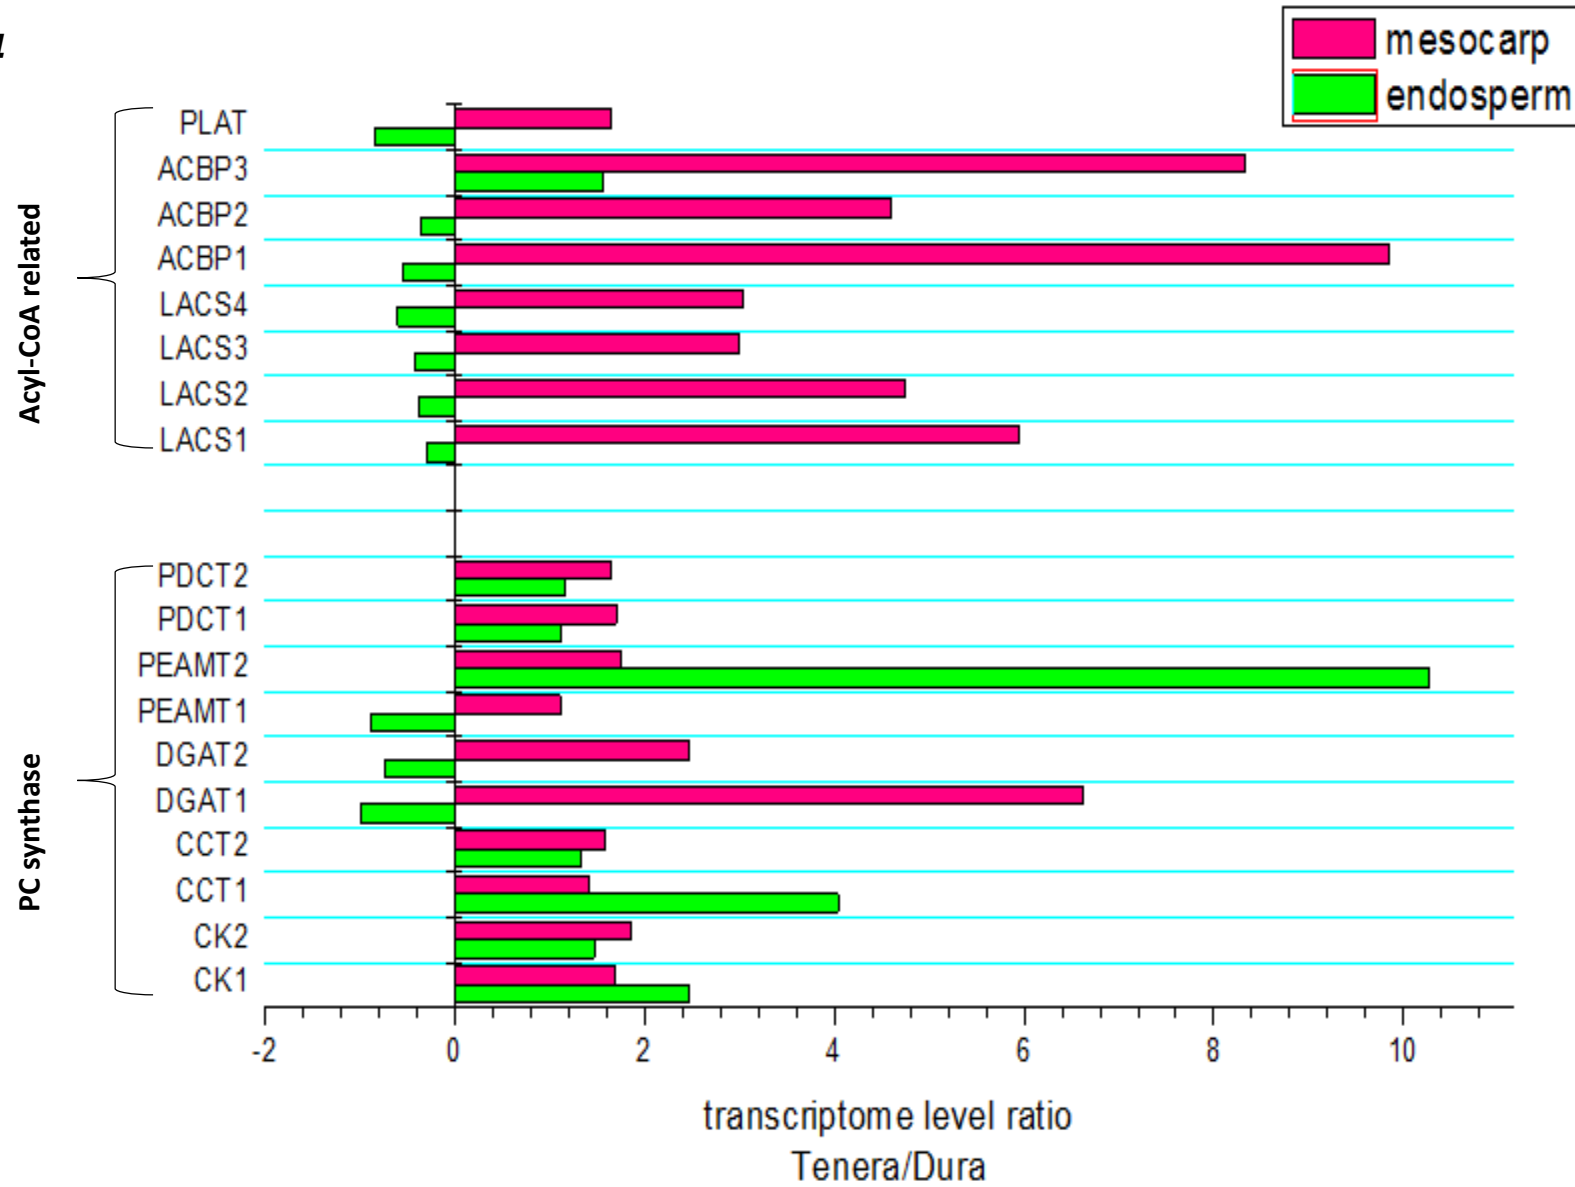

**Supplementary Figure S4: Transcriptome level ratio between Tenera and Dura for PC-Related enzymes.** ACBP: acyl-CoA binding protein; CCT: CTP: choline-phosphate cytidyltransferase; CK: choline kinase; DGAT: diacylglycerol acyltransferase; LACS: long-chain acyl-CoA synthase; PDCT: phosphatidylcholine: diacylglycerol cytidyltransferase; PEAMT: phosphoethanolamine methyl transferase; PLAT, phospholipid acyl transferase-like;

**Supplementary Figure S5**

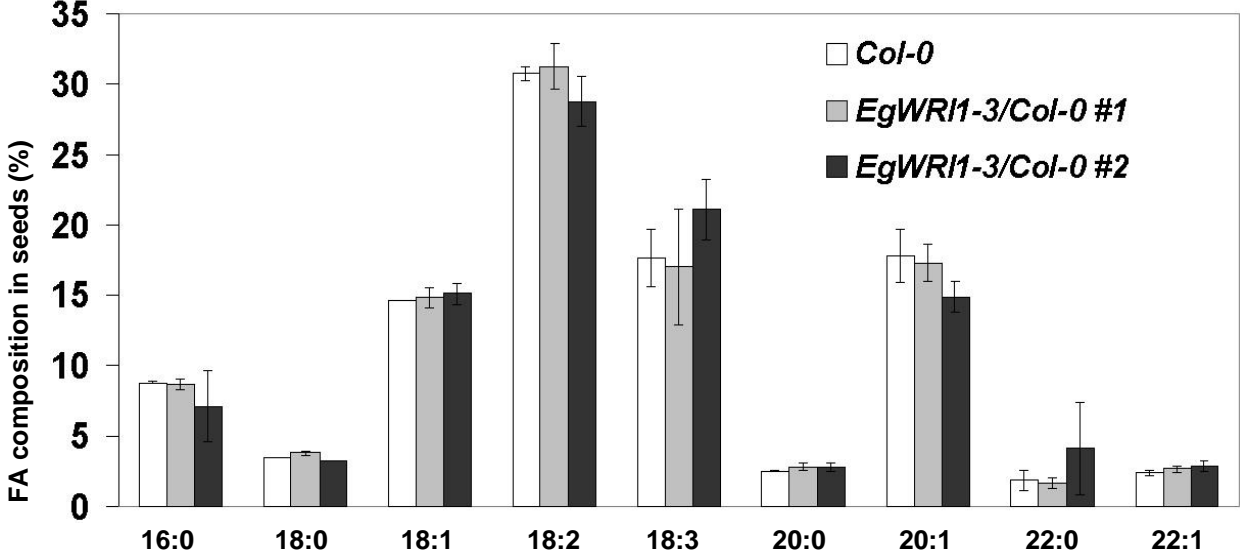

**Supplementary Figure S5: Fatty Acid (FA) composition was analysed for Col-0 and two *EgWRI1-3* expression lines in WT background.**

## Supplementary Figure S6

**A**

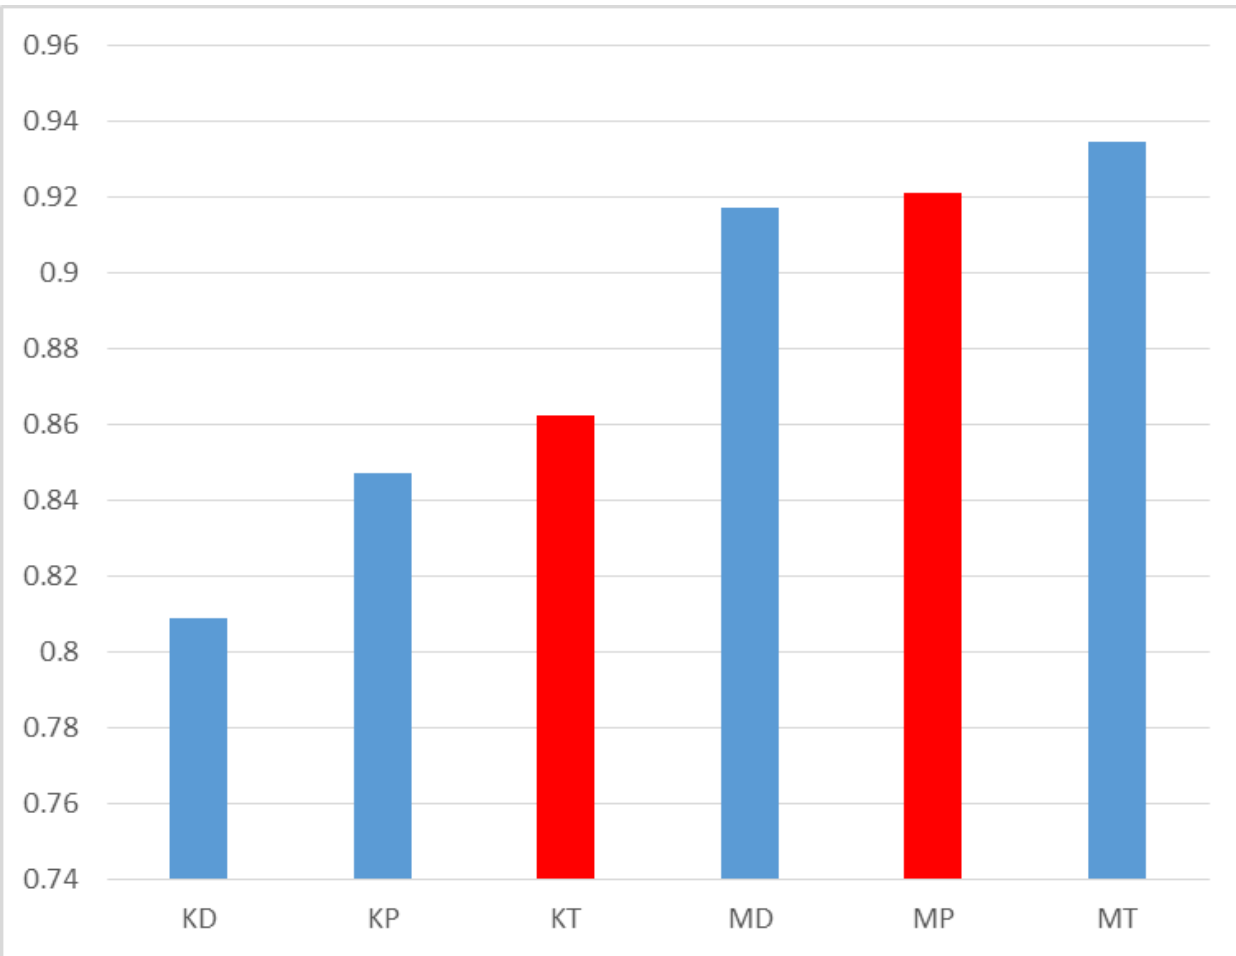

**B**

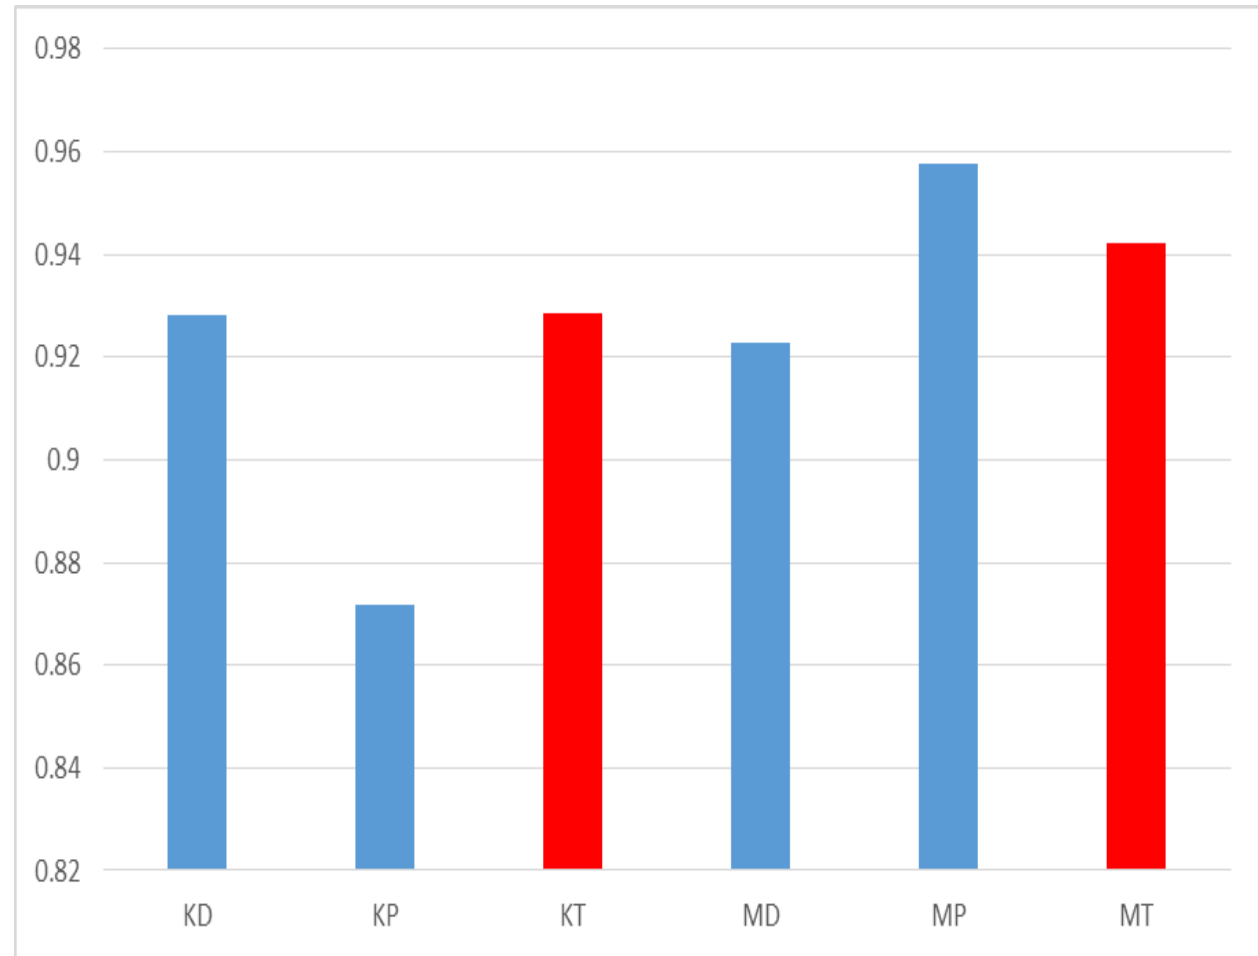

### Supplementary Figure S6: Portion of allele specific genes in each group.

**(A):** Portion of allele specific genes based on whole gene list. **(B):** Portion of allele specific genes based on fatty acid gene list.

KD represents endosperm of *Dura*, KP represents endosperm of *Pisifera*, KT represents endosperm of *Tenera*, MD represents mesocarp for *Dura*, MP represents mesocarp of *Pisifera*, MT represents mesocarp of *Tenera*.

## Supplementary Figure S7

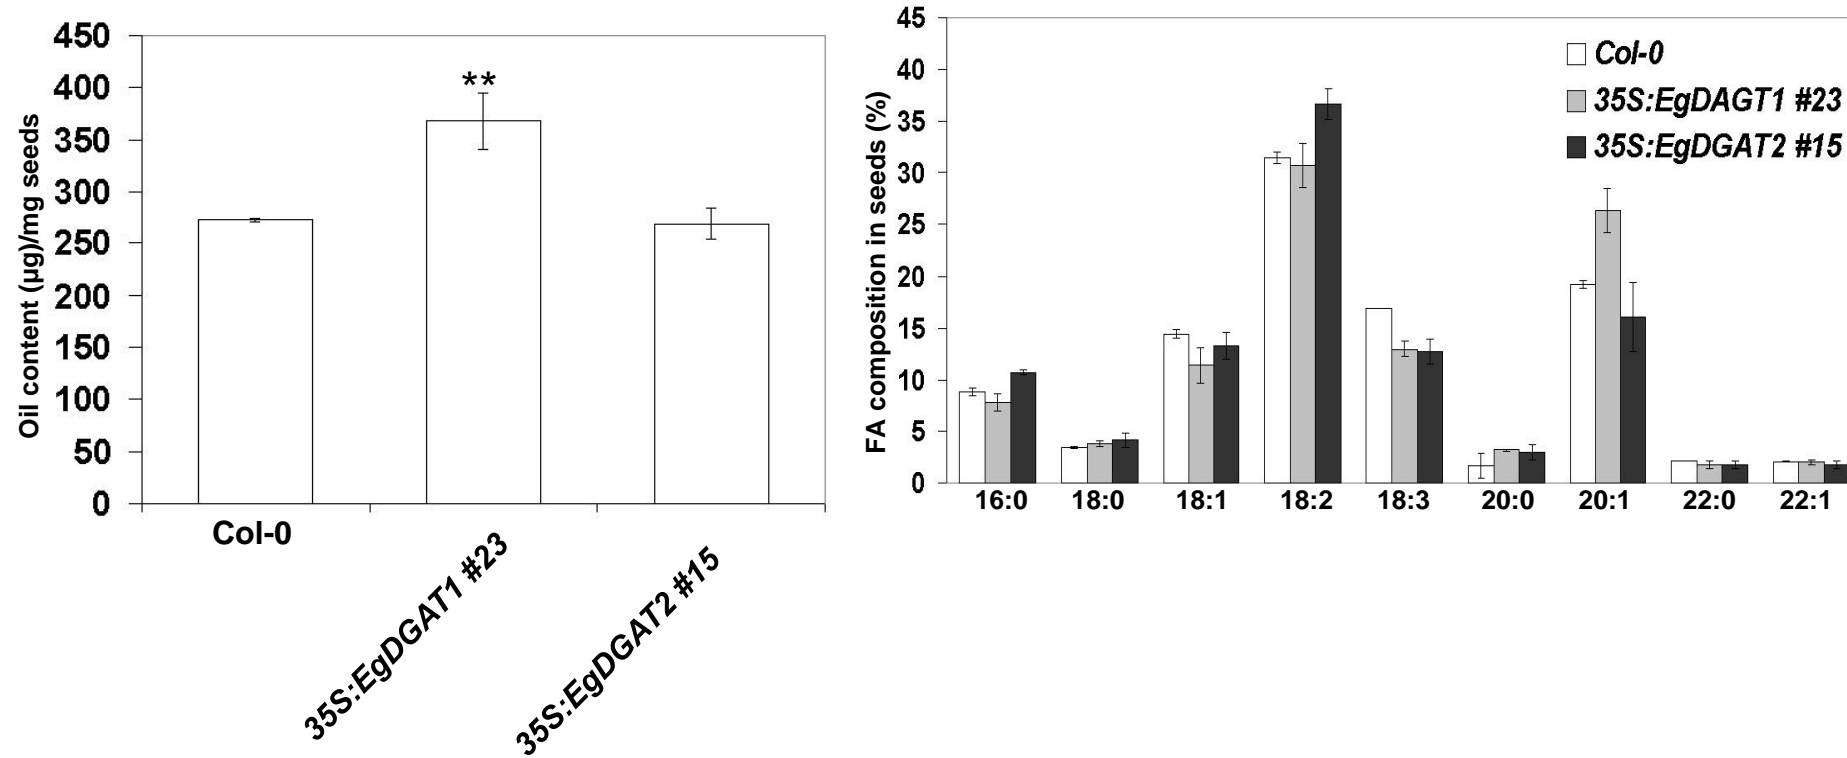

**Supplementary Figure S7: Functional characterization of *EgDGAT1* and *EgDGAT2* in Arabidopsis.**

**The expression level of oil palm *DAGT* paralog is similar in these transgenic lines.**

**(A):** Oil content analysis for *EgDGAT1* and *EgDGAT2* expression lines in Arabidopsis.

**(B):** Fatty Acid (FA) composition was analysed for Col-0, *EgDGAT1* and *EgDGAT2* expression lines in WT background.



Supplementary Figure S8

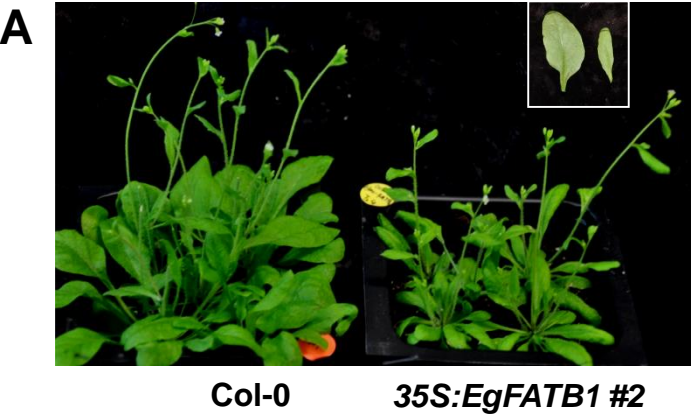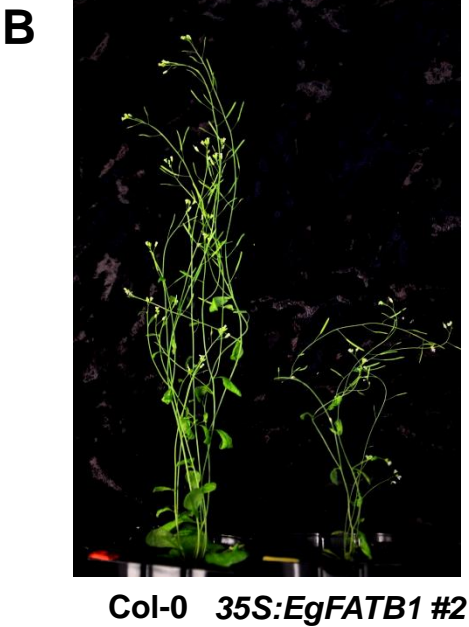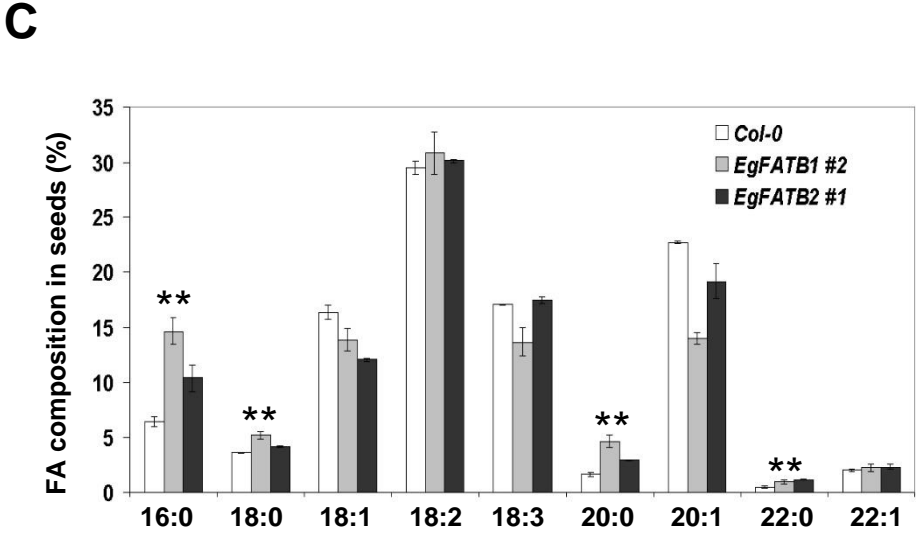

**Supplementary Figure S8: Functional characterization of *EgFATB1* and *EgFATB2* in Arabidopsis.**

**(A and B):** Phenotypes of *EgFATB1* expression in Arabidopsis. Size bar:10mm.

**(C):** Fatty Acid (FA) composition was analysed for Col-0, *EgFATB1* and *EgFATB2* expression lines in WT background. The expression level of oil palm *FATB* paralog is similar in these transgenic lines.

**Supplementary Table S1**

| #Term                                                      | Database            | ID                     | P-Value            |
|------------------------------------------------------------|---------------------|------------------------|--------------------|
| colanic acid building blocks biosynthesis                  | BioCyc              | COLANSYN-PWY           | 0.002560546        |
| choline biosynthesis I                                     | BioCyc              | PWY-3385               | 0.003959964        |
| DNA replication                                            | KEGG PATHWAY        | ath03030               | 0.007049678        |
| <b>Mannose metabolism</b>                                  | <b>PANTHER</b>      | <b>P02752</b>          | <b>0.007566702</b> |
| <b>Fatty acid metabolism</b>                               | <b>KEGG PATHWAY</b> | <b>ath01212</b>        | <b>0.009768289</b> |
| <b>phospholipid biosynthesis II</b>                        | <b>BioCyc</b>       | <b>PHOSLIPSYN2-PWY</b> | <b>0.011253982</b> |
| <b>xylan biosynthesis</b>                                  | <b>BioCyc</b>       | <b>PWY-5800</b>        | <b>0.012080739</b> |
| Amino sugar and nucleotide sugar metabolism                | KEGG PATHWAY        | ath00520               | 0.015341161        |
| <b>phosphatidylethanolamine biosynthesis II</b>            | <b>BioCyc</b>       | <b>PWY4FS-6</b>        | <b>0.017648576</b> |
| superpathway of choline biosynthesis                       | BioCyc              | PWY-4762               | 0.01874096         |
| <b>Fatty acid biosynthesis</b>                             | <b>KEGG PATHWAY</b> | <b>ath00061</b>        | <b>0.018867899</b> |
| Fructose and mannose metabolism                            | KEGG PATHWAY        | ath00051               | 0.023247125        |
| Protein export                                             | KEGG PATHWAY        | ath03060               | 0.025432248        |
| Phagosome                                                  | KEGG PATHWAY        | ath04145               | 0.026473654        |
| <b>superpathway of fatty acid biosynthesis II (plant)</b>  | <b>BioCyc</b>       | <b>PWY-5156</b>        | <b>0.027667005</b> |
| <b>GDP-mannose biosynthesis</b>                            | <b>BioCyc</b>       | <b>PWY-5659</b>        | <b>0.02965234</b>  |
| <b>fatty acid biosynthesis initiation I</b>                | <b>BioCyc</b>       | <b>PWY-4381</b>        | <b>0.02965234</b>  |
| <b>sphingolipid biosynthesis (plants)</b>                  | <b>BioCyc</b>       | <b>PWY-5129</b>        | <b>0.031534486</b> |
| <b>cellulose biosynthesis</b>                              | <b>BioCyc</b>       | <b>PWY-1001</b>        | <b>0.036814426</b> |
| <b>GDP-glucose biosynthesis</b>                            | <b>BioCyc</b>       | <b>PWY-5661</b>        | <b>0.036814426</b> |
| <b>UDP-glucose biosynthesis (from glucose 6-phosphate)</b> | <b>BioCyc</b>       | <b>PWYQT-4437</b>      | <b>0.04498809</b>  |
| Protein processing in endoplasmic reticulum                | KEGG PATHWAY        | ath04141               | 0.045155965        |
| <b>Glycerophospholipid metabolism</b>                      | <b>KEGG PATHWAY</b> | <b>ath00564</b>        | <b>0.045665184</b> |
| <b>fatty acid beta-oxidation II (peroxisome)</b>           | <b>BioCyc</b>       | <b>PWY-5136</b>        | <b>0.046299876</b> |
| Purine metabolism                                          | KEGG PATHWAY        | ath00230               | 0.047628854        |

**Supplementary Table S1: Enriched pathway by gene set in class 5 and 6 of Table 1 for endosperm.**

## Supplementary Table S2

| #Term                                   | Database     | ID             | P-Value   |
|-----------------------------------------|--------------|----------------|-----------|
| superpathway of carotenoid biosynthesis | BioCyc       | CAROTENOID-PWY | 0.0001227 |
| cytokinins-O-glucoside biosynthesis     | BioCyc       | PWY-2902       | 0.0071702 |
| Carotenoid biosynthesis                 | KEGG PATHWAY | ath00906       | 0.0103129 |
| methionine biosynthesis II              | BioCyc       | PWY-702        | 0.0115112 |
| Photosynthesis                          | KEGG PATHWAY | ath00195       | 0.019201  |
| lutein biosynthesis                     | BioCyc       | PWY-5947       | 0.0263469 |
| salvianin biosynthesis                  | BioCyc       | PWY-5268       | 0.0263469 |
| trans-lycopene biosynthesis II (plants) | BioCyc       | PWY-6475       | 0.0263469 |
| shisonin biosynthesis                   | BioCyc       | PWY-5284       | 0.0263469 |
| Pentose phosphate pathway               | KEGG PATHWAY | ath00030       | 0.0309417 |
| pelargonidin conjugates biosynthesis    | BioCyc       | PWY-5139       | 0.0342649 |
| Metabolic pathways                      | KEGG PATHWAY | ath01100       | 0.0392    |
| Selenocompound metabolism               | KEGG PATHWAY | ath00450       | 0.0484728 |

Supplementary Table S2: Enriched pathway by gene set in class 5 and 6 of Table 1 for mesocarp.

**Supplementary Table S3**

|                    |        | <i>Dura</i> | <i>Pisifera</i> | <i>Tenera</i> |
|--------------------|--------|-------------|-----------------|---------------|
| <b>1.5<br/>MAF</b> | C14:0  | 0±0         | 0±0             | 0±0           |
|                    | C16:0  | 41.8±2.0    | 46.2±0.6 *      | 42.8±5.7      |
|                    | C18:0  | 9.4±0.5     | 10.4±0.4 *      | 7.3±1.4*      |
|                    | C18:1  | 13.1±0.5    | 13.4±2.5        | 12.1±1.3      |
|                    | C18:2  | 27.1±1.5    | 26.5±2.2        | 33.2±3.0 *    |
|                    | C18:3  | 7.0±0.3     | 3.6±0.5*        | 4.6±1.2*      |
|                    | others | 1.5±0.2     | 0±0*            | 0±0*          |
| <b>2.5<br/>MAF</b> | C14:0  | 1.3±0.9     | 0.5±0*          | 2.1±0.2       |
|                    | C16:0  | 42.0±1.0    | 47.2±0.1*       | 39.1±2.0      |
|                    | C18:0  | 9.7±0.5     | 7.0±0.5*        | 8.2±1.3       |
|                    | C18:1  | 21.4±1.1    | 32.7±0.8*       | 19.0±0.8*     |
|                    | C18:2  | 19.9±1.2    | 23.1±0.1*       | 24.2±0.5*     |
|                    | C18:3  | 5.3±0.5     | 3.6±0.2*        | 6.4±0.3*      |
|                    | others | 0.3±0.1     | 0±0*            | 1.1±0.6*      |
| <b>3.5<br/>MAF</b> | C14:0  | 0.9±0.1     | 0.6±0.1*        | 1.50±0.2*     |
|                    | C16:0  | 42.6±2.3    | 44.8±0.6        | 38.3±1.0*     |
|                    | C18:0  | 6.5±0.3     | 4.7±0.2*        | 5.4±0.1*      |
|                    | C18:1  | 35.4±3.2    | 32.7±0.8        | 34.5±0.6      |
|                    | C18:2  | 12.5±1.1    | 17.1±0.4*       | 16.7±0.9*     |
|                    | C18:3  | 0.4±0       | 0.3±0.1         | 2.1±0.1*      |
|                    | others | 0.3±0       | 0±0*            | 1.5±0.6*      |
| <b>4.5<br/>MAF</b> | C14:0  | 1.1±0.1     | 1.2±0           | 1.7±0*        |
|                    | C16:0  | 43.7±3.2    | 45.3±0.6        | 54.3±1.8*     |
|                    | C18:0  | 4.0±0.2     | 5.1±0.1*        | 3.6±0.4       |
|                    | C18:1  | 43.3±2.1    | 30.8±2.1*       | 33.4±2.7*     |
|                    | C18:2  | 7.7±1.2     | 17.4±0.6*       | 7.0±0         |
|                    | C18:3  | 0.3±0       | 0.3±0           | 0.2±0*        |
|                    | others | 0±0         | 0±0             | 0±0           |
| <b>5.5<br/>MAF</b> | C14:0  | 1.3±0.1     | 0.6±0.1*        | 2.0±0.0*      |
|                    | C16:0  | 42.9±1.2    | 41.3±1.1        | 45.6±0.5*     |
|                    | C18:0  | 5.8±0.2     | 4.8±0.7*        | 4.3±0.1*      |
|                    | C18:1  | 40.2±0.6    | 38.6±0.8*       | 38.0±0.1*     |
|                    | C18:2  | 9.6±1.6     | 14.7±1.8*       | 9.5±0.3       |
|                    | C18:3  | 0.2±0.1     | 0.2±0           | 0.3±0         |
|                    | others | 0±0         | 0±0             | 0±0           |

**Supplementary Table S3: Fatty acid composition (mol%) of the developing endosperm of oil palm (months after fertilization, MAF).** Data was presented as average of 3 fruit repeats  $\pm$  SD. The significance of the effect of the varieties was tested by t-Test (P values, \*, P<0.05) when compared between *Dura* with either *Pisifera* or *Tenera*.

**Supplementary Table S4**

|            | FA    | <i>Dura</i> | <i>Pisifera</i> | <i>Tenera</i> |
|------------|-------|-------------|-----------------|---------------|
| 1.5<br>MAF | C8:0  | 0±0         | nd              | 0±0           |
|            | C10:0 | 0±00        | nd              | 0±0           |
|            | C12:0 | 0.9±0.2     | nd              | 0.1±0*        |
|            | C14:0 | 0.6±0.1     | nd              | 1.6±0.6*      |
|            | C16:0 | 34.6±3.6    | nd              | 38.2±5.2      |
|            | C18:0 | 6.3±0.6     | nd              | 4.3±0.9*      |
|            | C18:1 | 45.8±5.3    | nd              | 41.9±6.2      |
|            | C18:2 | 11.4±1.6    | nd              | 13.6±0.6      |
|            | C18:3 | 0.3±0.1     | nd              | 0.3±0.1       |
| 2.5<br>MAF | C8:0  | 0.2±0.1     | 0±0*            | 0.3±0.1       |
|            | C10:0 | 2.3±0.2     | 3.9±0.2*        | 3.0±0.6       |
|            | C12:0 | 30.2±2.0    | 55.9±3.6*       | 32.1±2.8      |
|            | C14:0 | 12.3±1.9    | 20.0±1.4*       | 10.6±1.3      |
|            | C16:0 | 14.3±0.8    | 7.8±0.3*        | 13.7±0.5      |
|            | C18:0 | 2.5±0.6     | 2.6±0.6         | 3.2±0.3       |
|            | C18:1 | 30.9±1.2    | 7.7±1.2*        | 30.3±3.5      |
|            | C18:2 | 7.0±0.2     | 1.8±0.4*        | 6.6±0.6       |
|            | C18:3 | 0.3±0.1     | 0.2±0.1         | 0.2±0.1       |
| 3.5<br>MAF | C8:0  | 0.3±0.1     | 0±0*            | 0.6±0.5*      |
|            | C10:0 | 5.1±0.8     | 3.0±0.6*        | 4.5±0.7       |
|            | C12:0 | 58.2±4.8    | 50.2±5.1        | 50.9±6.3      |
|            | C14:0 | 15.7±1.1    | 16.9±2.1        | 18.8±1.5      |
|            | C16:0 | 6.7±1.2     | 8.5±0.8         | 8.0±1.6       |
|            | C18:0 | 1.6±0.3     | 2.2±0.3         | 1.3±0.3       |
|            | C18:1 | 10.6±2.6    | 15.8±1.3*       | 12.8±3.1      |
|            | C18:2 | 2.0±0.5     | 3.5±0.4*        | 2.8±0.7       |
|            | C18:3 | 0.1±0       | 0.2±0*          | 0.2±0.1       |
| 4.5<br>MAF | C8:0  | 0.2±0       | 0±0             | 1.1±0.6*      |
|            | C10:0 | 4.7±0       | 2.4±0.5*        | 5.0±0.4       |
|            | C12:0 | 57.3±0.3    | 50.7±3.1*       | 56.1±2.1      |
|            | C14:0 | 16.5±0.3    | 19.3±1.6*       | 17.7±0.3*     |
|            | C16:0 | 6.9±0.1     | 9.8±0.4*        | 6.5±0.5       |
|            | C18:0 | 1.6±0       | 1.3±0.2*        | 1.3±0.1       |
|            | C18:1 | 11.3±0.1    | 13.5±0.6*       | 10.6±0.9      |
|            | C18:2 | 1.7±0       | 2.7±0.1*        | 1.5±0*        |
|            | C18:3 | 0.1±0       | 0.2±0.1         | 0.2±0*        |
| 5.5<br>MAF | C8:0  | 0.2±0       | 0.9±0.2*        | 0±0*          |
|            | C10:0 | 4.4±0.1     | 4.4±0.7         | 4.1±0.2       |
|            | C12:0 | 51.9±0.2    | 57.2±1.4*       | 50.0±2.0      |
|            | C14:0 | 18.1±0.1    | 17.5±0.8*       | 18.6±0.9      |
|            | C16:0 | 8.4±0.1     | 6.2±0.8*        | 8.2±0.9       |
|            | C18:0 | 1.8±0       | 1.1±0.1*        | 1.7±0.1       |
|            | C18:1 | 13.0±0.1    | 11.1±0.6*       | 13.7±0.4      |
|            | C18:2 | 2.4±0       | 1.3±0*          | 2.5±0.2       |
| C18:3      | 0.1±0 | 0.3±0.1*    | 0.1±0           |               |

**Supplementary Table S4: Fatty acid composition (mol%) of the developing mesocarp (months after fertilization, MAF). Data was presented as average of at least 3 fruit repeats ± SD. The significance of the effect of the varieties was tested by t-Test (P values, \*, P<0.05) when compared between *Dura* with either *Pisifera* or *Tenera*.**

## Supplementary Table S5

| <i>Tenera VS Dura</i>                            | Total No. (UP: Down), Ratio of UP/Down in Endosperm | Total No. (UP: Down), Ratio of UP/Down in Mesocarp |
|--------------------------------------------------|-----------------------------------------------------|----------------------------------------------------|
| <b>Whole transcriptome</b>                       | <b>59078 (3364:2789), 1.2</b>                       | <b>59078 (8300:616), 13.5</b>                      |
| <b>Total in FA pathway</b>                       | <b>338(36: 20), 1.8</b>                             | <b>338 (51: 1), 51</b>                             |
| Plastidial Fatty Acid Synthesis                  | 57 (10: 1), <b>10</b>                               | 57 (7: 1), <b>7</b>                                |
| TAG Synthesis                                    | 22 (1: 1), 1                                        | 22 (0: 0)                                          |
| Extra Plastidial Phospholipid Synthesis          | 52 (11: 1), <b>11</b>                               | 52 (8: 0)                                          |
| Other Fatty Acid and TAG Synthesis Related Genes | 20 (0: 2), 0                                        | 20 (3: 0)                                          |
| Plastid Polar Lipids                             | 33 (0: 2), 0                                        | 33 (12:0)                                          |
| Mitochondrial Lipid Synthesis                    | 23 (1: 2), 0.5                                      | 23 (4:0)                                           |
| Sphingolipid Synthesis                           | 42 (6:1), <b>6</b>                                  | 42 (4:0)                                           |
| oleosin                                          | 4 (0: 1), 0                                         | 4 (0: 0)                                           |
| Lipase                                           | 55 (5:5), 1                                         | 55 (10:0)                                          |
| $\beta$ -Oxidation                               | 42 (2:4), 0.5                                       | 42 (5: 0)                                          |
| <b>Glycolysis</b>                                | <b>131 (17:13), 1.3</b>                             | <b>131 (20:2), 10</b>                              |
| <b>Glycolysis (plastid)</b>                      | <b>55(5:5), 1</b>                                   | <b>55 (7:2), 3.5</b>                               |

**Supplementary Table S5: Summary of up- or down-regulated genes when compared the expression level of *Tenera* against *Dura*. Assumed at least 2 folds change as up- or down-regulated genes.**

**Supplementary Table S6**

| Gene       | Sequence (5'-3')                                   | Purpose          |
|------------|----------------------------------------------------|------------------|
| EgWRI1-1   | AATAAGTCGACATGAAGAACTCTCCTCCCTCTACT                | Plant expression |
|            | TTAATTCTAGACTAGGCACCTTTGCTTGCACTGAAACCA            | Plant expression |
| EgWRI1-3   | AATAAGTCGACATGAAGAAATCTCCTCCCTCTCCTCC              | Plant expression |
|            | TTAATTCTAGACTAAGAGCATATACTAATCTGAAGGGGGT           | Plant expression |
| EgDGAT1    | AACAAGTCGACATGGCGGTCTCGAAGAATCCAGAAA               | Plant expression |
|            | GATCTGGATCCCTCTGTTCCCACTTTTCTGTTTCAT               | Plant expression |
| EgDGAT2    | AGCGCGTCGACATGGGGGCAGAATTCTGTCTCTCTCTCT            | Plant expression |
|            | AGTCTGGATCCTAAACTCTCAAACGAAAAT                     | Plant expression |
| EgFATB1    | AGACAGTCGACATGGTTGCTTCGATTGTCGCTTGGGCCTTTTT        | Plant expression |
|            | TTATTCTAGATCAAGCACTTCCAGCTGAAGTGGGA                | Plant expression |
| EgFATB2    | AGATGTCGACATGGTTGCTTCAATTGCCGCCT                   | Plant expression |
|            | TTATTCTAGATCATGCACTACCACCTGGAGTTGG                 | Plant expression |
| EgFATB3    | AATACAGTCGACATGGTCGCCTCCGTTGCTGCCTC                | Plant expression |
|            | TTATTTCTAGAT <sub>7</sub> ATCATTTAGTCTCAGTTGGGAGCA | Plant expression |
| EgWRI1-1-F | GTCTACAAGCATCGCCTACAG                              | qRT-PCR          |
| EgWRI1-1-R | CAGGTCGTAATTTGGCATGGT                              | qRT-PCR          |
| EgWRI1-2-F | ACCTTCGACAAGGACCATGA                               | qRT-PCR          |
| EgWRI1-2-R | TGTCCTGTCCATGGCAGCCTG                              | qRT-PCR          |
| EgWRI1-3-F | GGACACCAGGAGTTTAGCCCA                              | qRT-PCR          |
| EgWRI1-3-R | ATTCTTCCATGCTAATGATAC                              | qRT-PCR          |
| EgEF1F     | CCTGTGCTTGATTGCCAC                                 | qRT-PCR          |
| EgEF1R     | GTCTCAACCACCATAGGC                                 | qRT-PCR          |

**Supplementary Table S6: List of primers used in this study.**
